# Supplementary material
Source: PubMed Central journal article supplement (PMC3680738)
Supplement: emboj2013116df6.pdf [file emboj2013116df6.pdf]

Figure 6A

Anti-arfaptin1

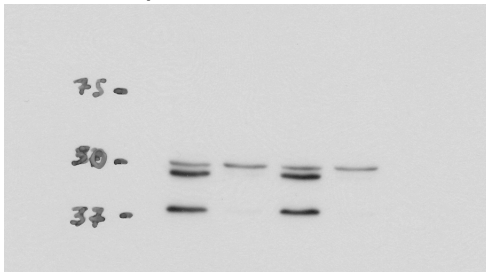

Anti-arfaptin2

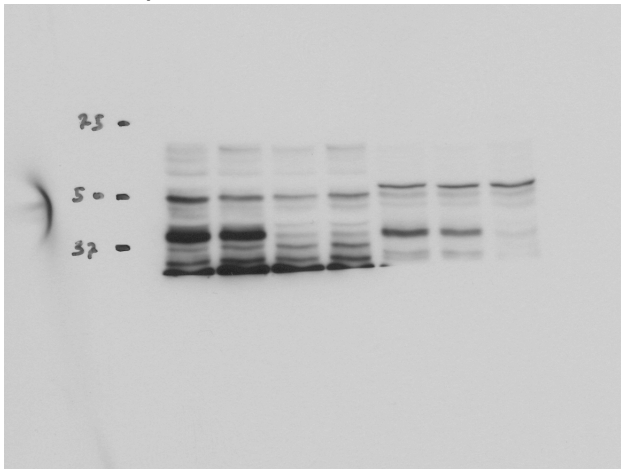

Anti-beta-tubulin

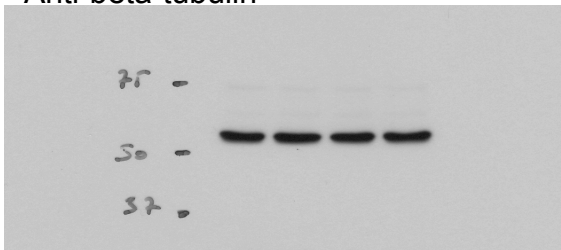

Figure 6C

Autoradiography

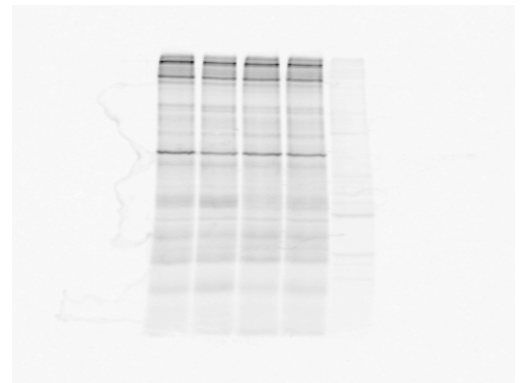

Dried gel

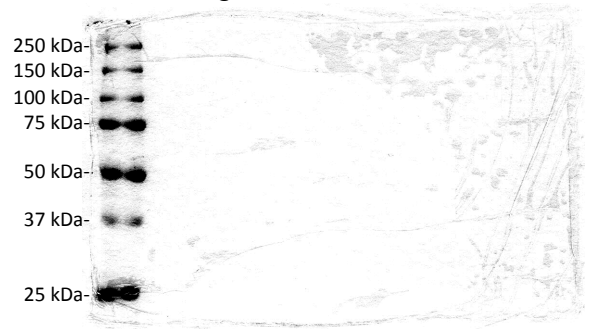

Figure 6D

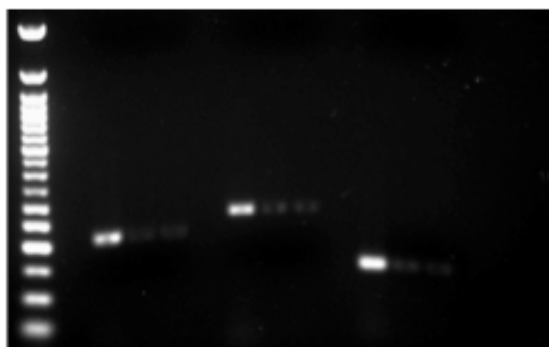

CG17184

Syx5

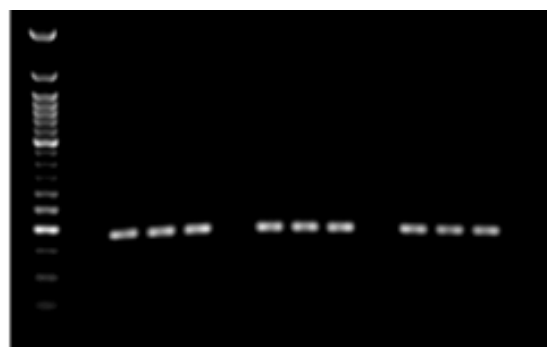

Alpha-tubulin
