# Supplementary material
Source: PubMed Central journal article supplement (PMC3680738)

Figure 1D

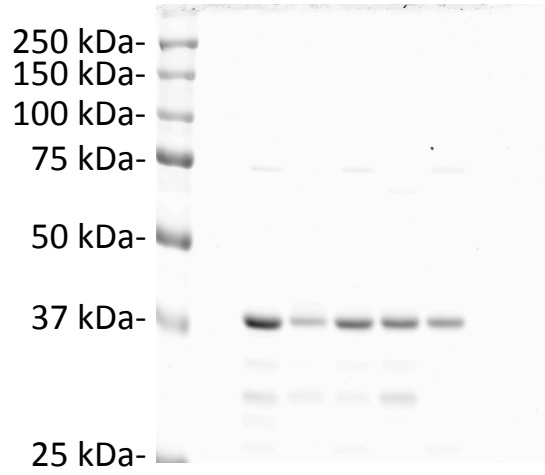

Arfaptin1

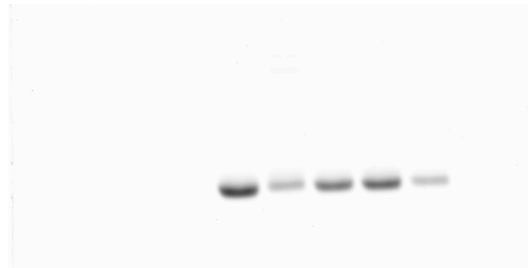

Arfaptin2

Supplement: emboj2013116df1d.pdf [file emboj2013116df1d.pdf]

Figure 3E

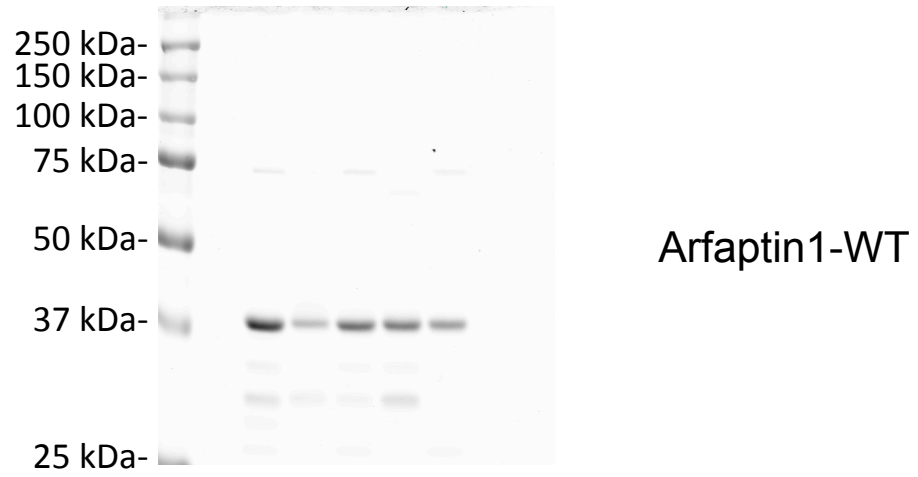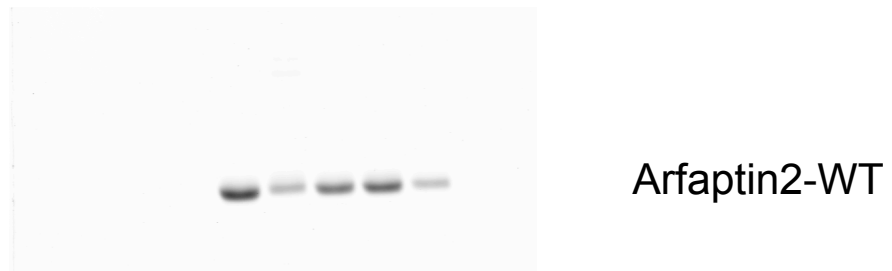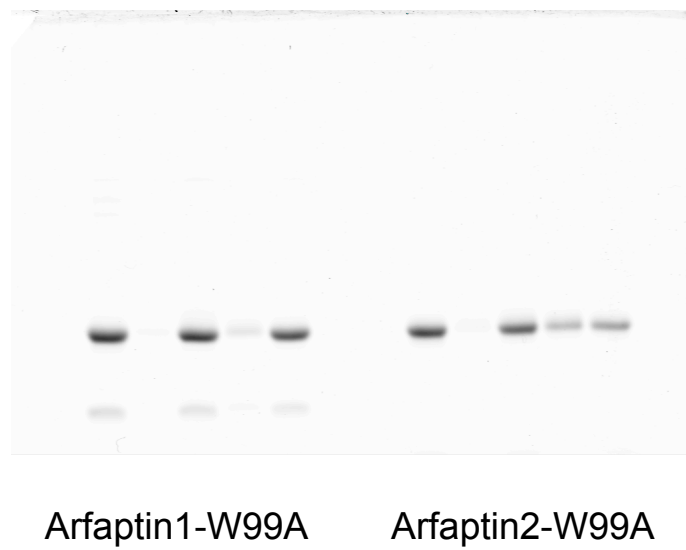

Supplement: emboj2013116df3e.pdf [file emboj2013116df3e.pdf]

Figure 4

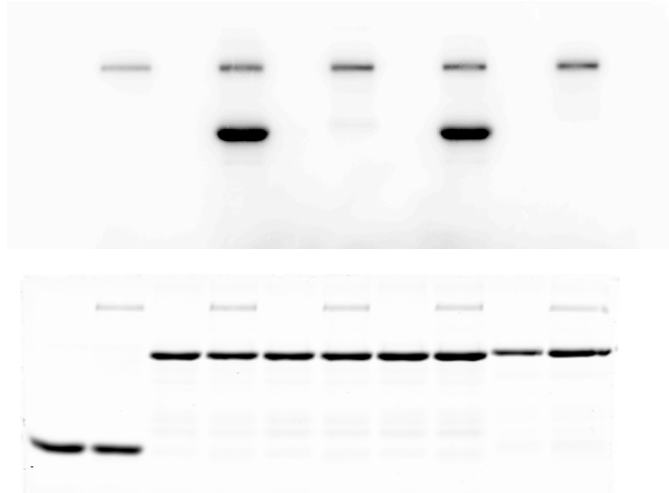

Supplement: emboj2013116df4.pdf [file emboj2013116df4.pdf]

Figure 5E

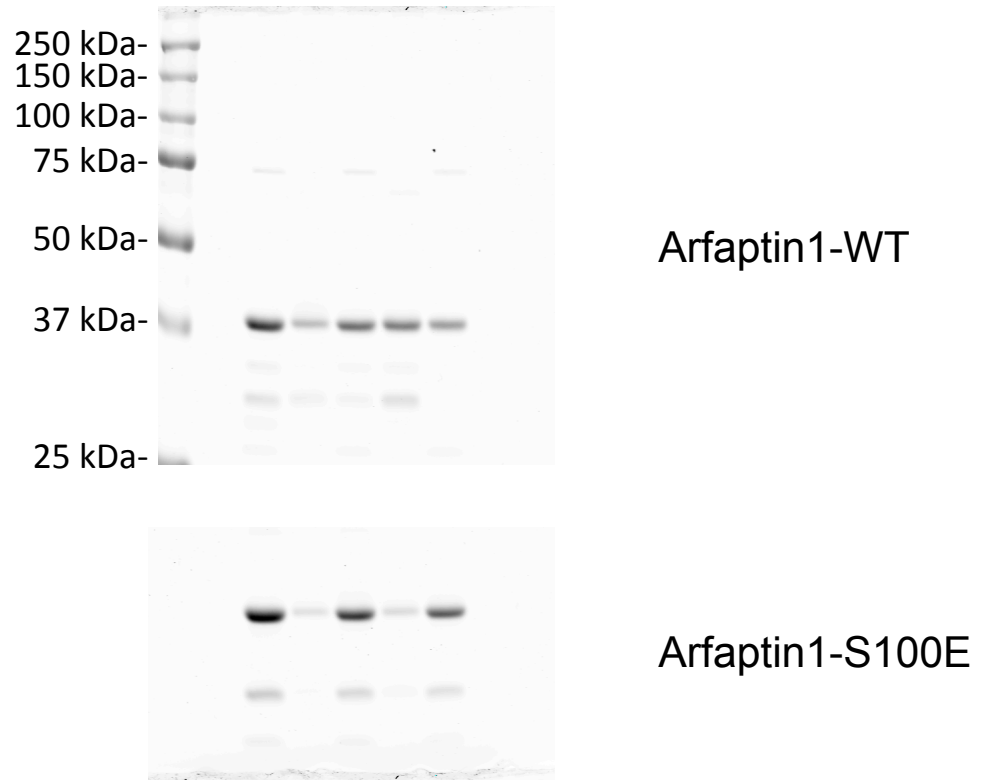

Supplement: emboj2013116df5e.pdf [file emboj2013116df5e.pdf]

Figure 7A

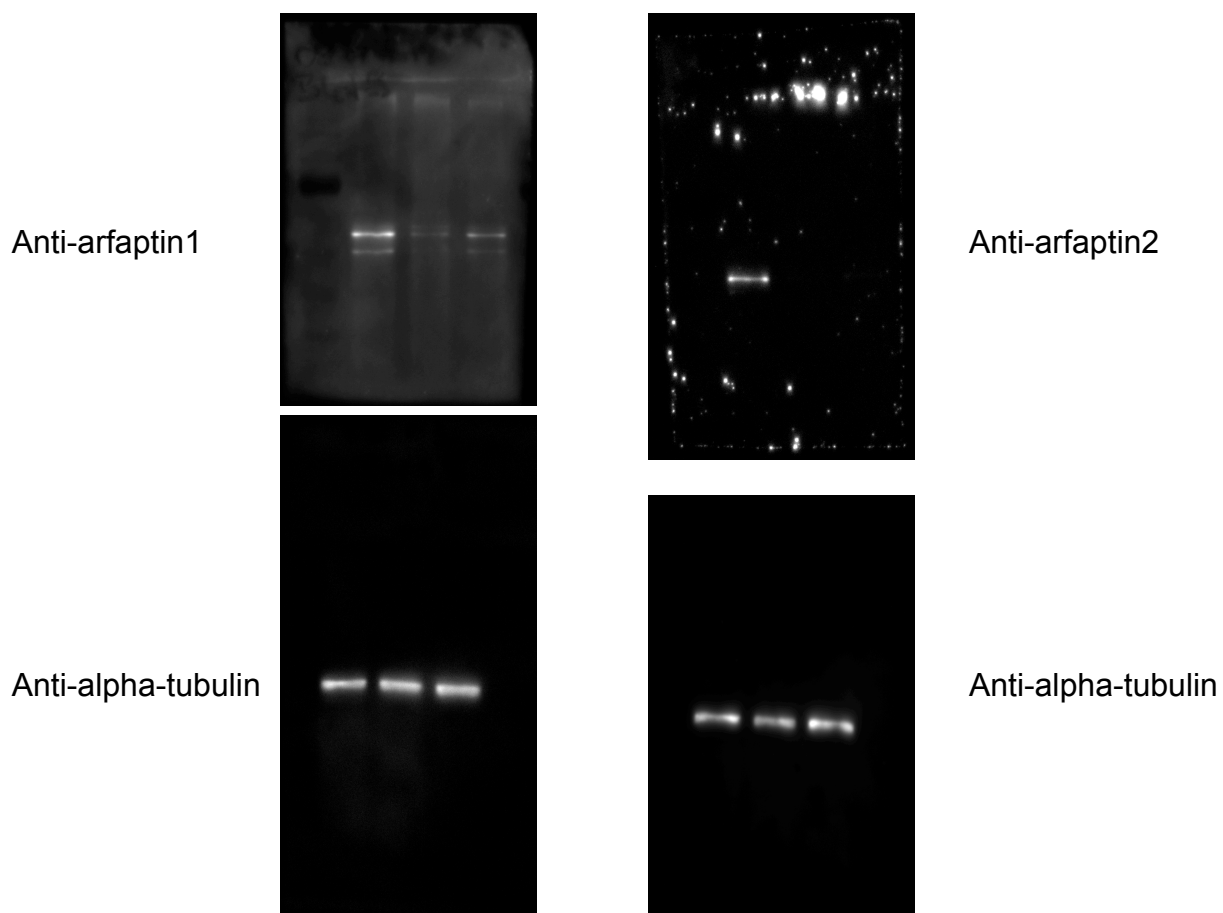

Figure 7B

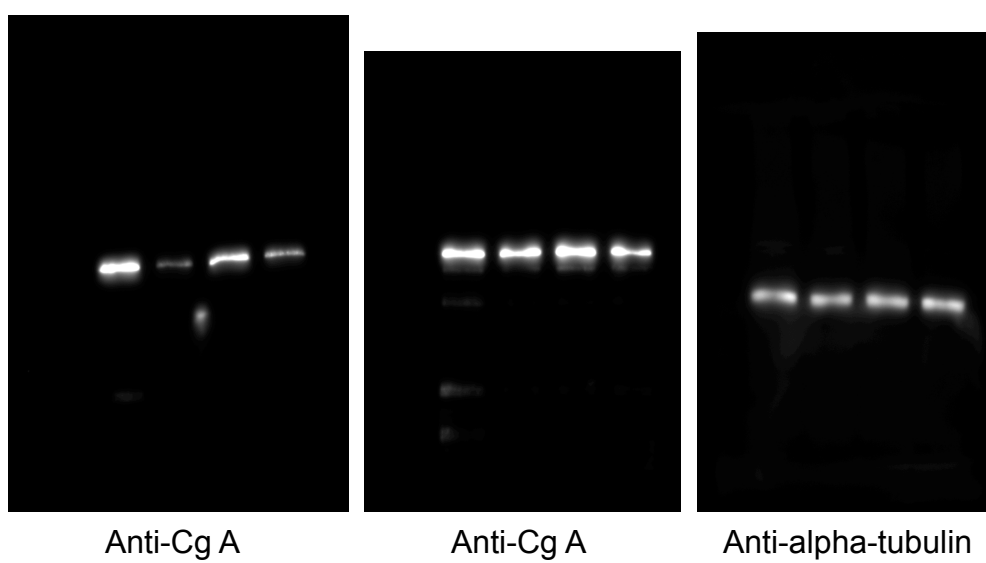

Supplement: emboj2013116df7.pdf [file emboj2013116df7.pdf]

Figure S2

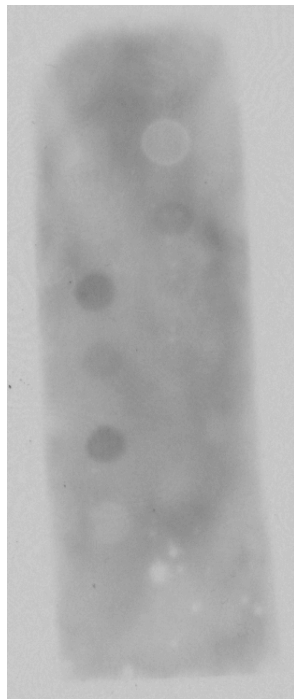

Arfaptin1

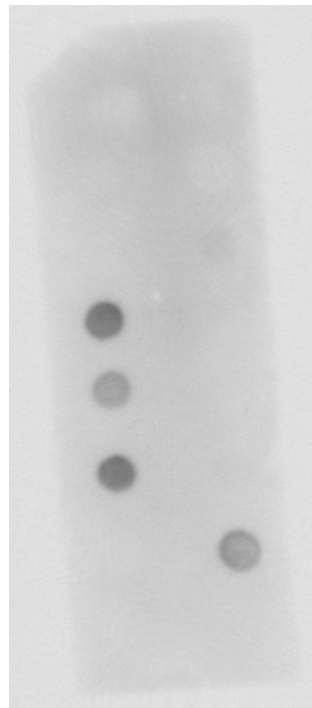

Arfaptin2

Supplement: emboj2013116dfs2.pdf [file emboj2013116dfs2.pdf]

Figure S3

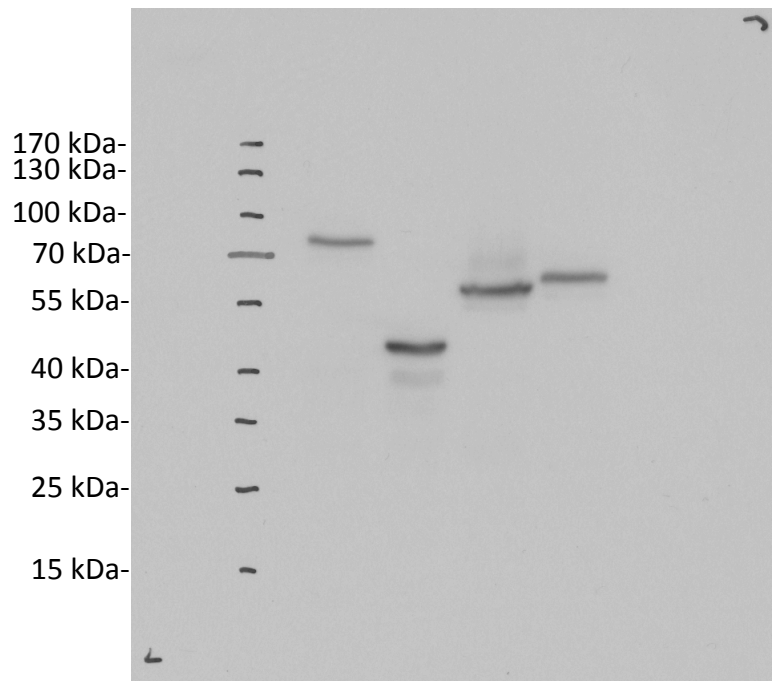

Supplement: emboj2013116dfs3.pdf [file emboj2013116dfs3.pdf]

Figure S4

Autoradiography

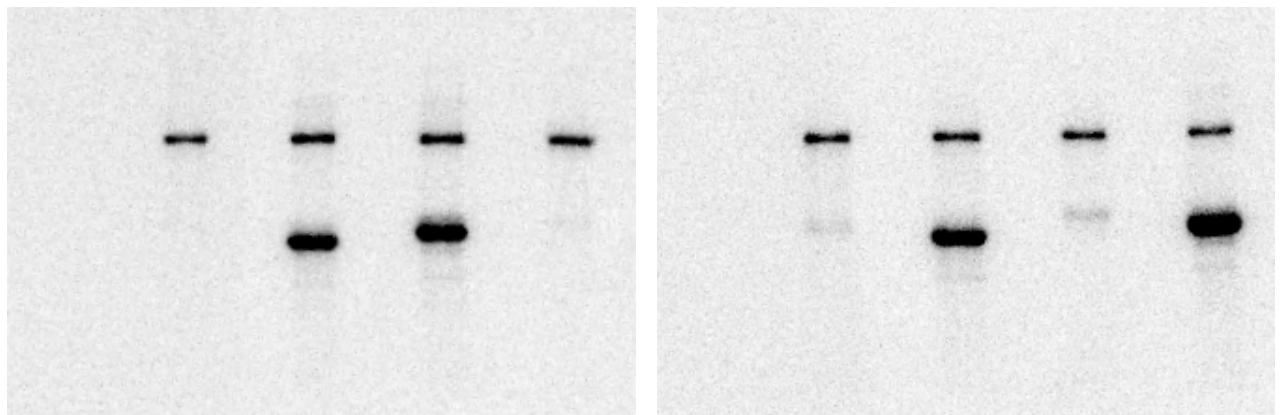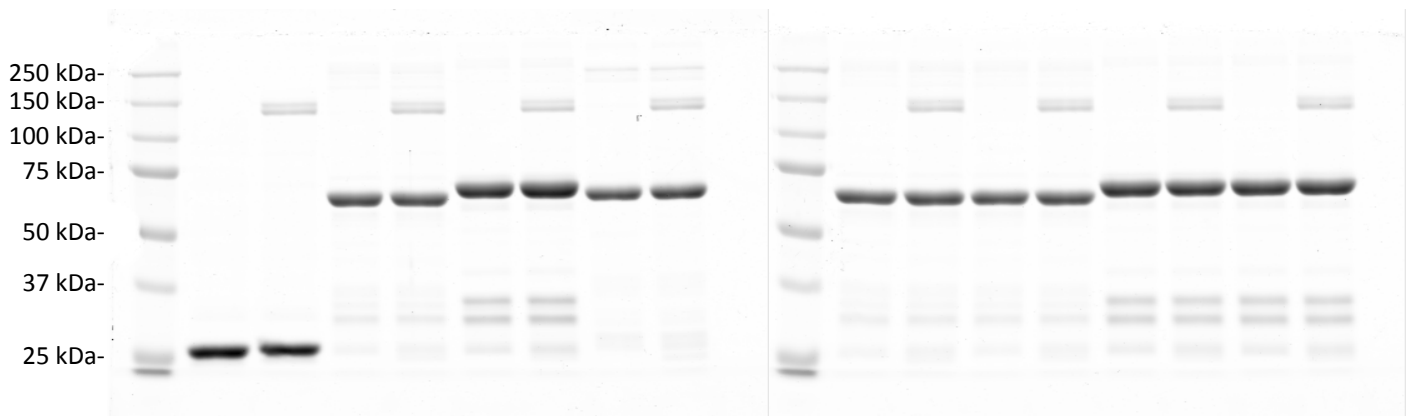

Coomassie

Supplement: emboj2013116dfs4.pdf [file emboj2013116dfs4.pdf]

Figure S5

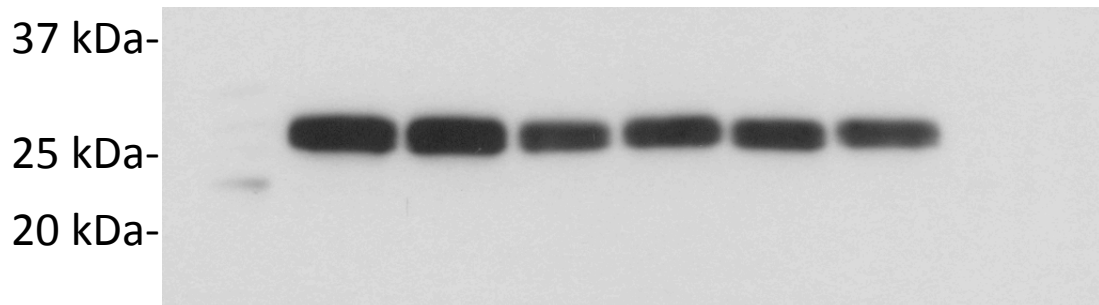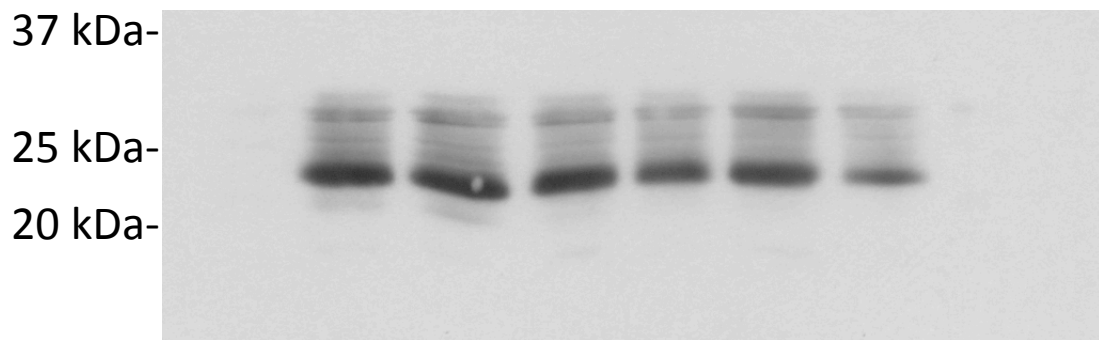

Supplement: emboj2013116dfs5.pdf [file emboj2013116dfs5.pdf]
